# Supplementary material
Source: PubMed Central journal article supplement (PMC9450215)

**A**

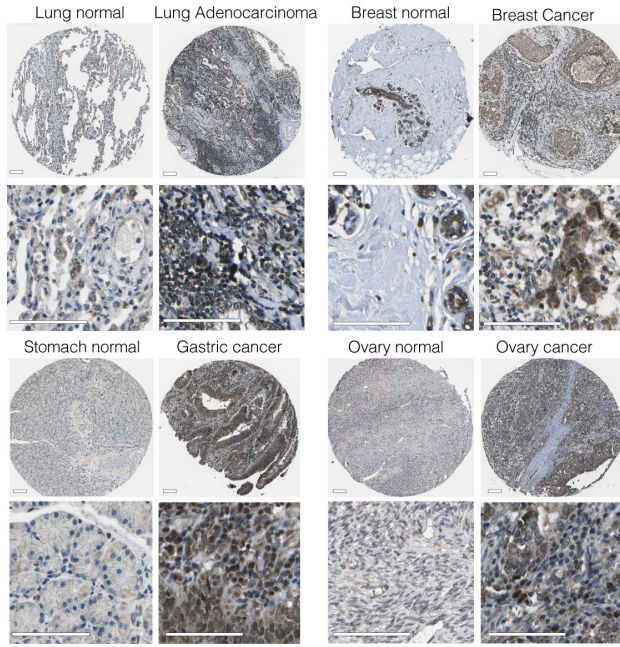

**B**

| TCGA | Detail                                                           | n (tumor) | n (normal tissue) |
|------|------------------------------------------------------------------|-----------|-------------------|
| ACC  | Adrenocortical carcinoma                                         | 77        | 128               |
| BLCA | Bladder Urothelial Carcinoma                                     | 404       | 28                |
| BRCA | Breast invasive carcinoma                                        | 1085      | 291               |
| CESC | Cervical squamous cell carcinoma and endocervical adenocarcinoma | 306       | 13                |
| CHOL | Cholangio carcinoma                                              | 36        | 9                 |
| COAD | Colon adenocarcinoma                                             | 275       | 349               |
| DLBC | Lymphoid Neoplasm Diffuse Large B-cell Lymphoma                  | 47        | 337               |
| ESCA | Esophageal carcinoma                                             | 182       | 286               |
| GBM  | Glioblastoma multiforme                                          | 207       | 207               |
| HNSC | Head and Neck squamous cell carcinoma                            | 44        | 44                |
| KICH | Kidney Chromophobe                                               | 53        | 53                |
| KIRC | Kidney renal clear cell carcinoma                                | 100       | 100               |
| KIRP | Kidney renal papillary cell carcinoma                            | 286       | 60                |
| LAML | Acute Myeloid Leukemia                                           | 173       | 70                |
| LGG  | Brain Lower Grade Glioma                                         | 518       | 207               |
| LIHC | Liver hepatocellular carcinoma                                   | 369       | 160               |
| LUAD | Lung adenocarcinoma                                              | 483       | 347               |
| LUSC | Lung squamous cell carcinoma                                     | 486       | 338               |
| MESO | Mesothelioma                                                     | 87        |                   |
| OV   | Ovarian serous cystadenocarcinoma                                | 426       | 88                |
| PAAD | Pancreatic adenocarcinoma                                        | 179       | 171               |
| PCPG | Pheochromocytoma and Paraganglioma                               | 182       | 3                 |
| PRAD | Prostate adenocarcinoma                                          | 492       | 152               |
| READ | Rectum adenocarcinoma                                            | 92        | 318               |
| SARC | Sarcoma                                                          | 262       | 2                 |
| SKCM | Skin Cutaneous Melanoma                                          | 461       | 558               |
| STAD | Stomach adenocarcinoma                                           | 408       | 211               |
| TGCT | Testicular Germ Cell Tumors                                      | 137       | 165               |
| THCA | Thyroid carcinoma                                                | 512       | 337               |
| THYM | Thymoma                                                          | 118       | 339               |
| UCEC | Uterine Corpus Endometrial Carcinoma                             | 174       | 91                |
| UCS  | Uterine Carcinosarcoma                                           | 57        | 78                |
| UVM  | Uveal Melanoma                                                   | 79        |                   |

**C**

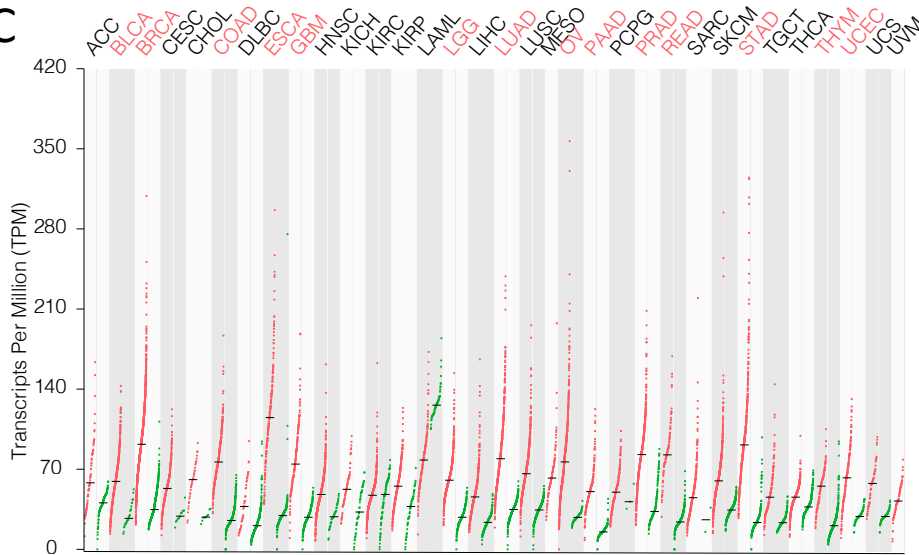

**D**

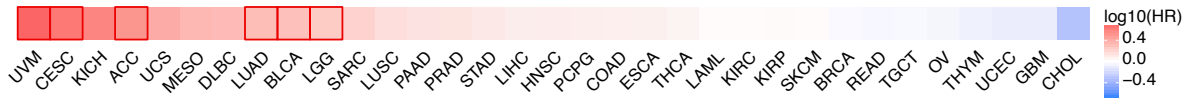

**E**

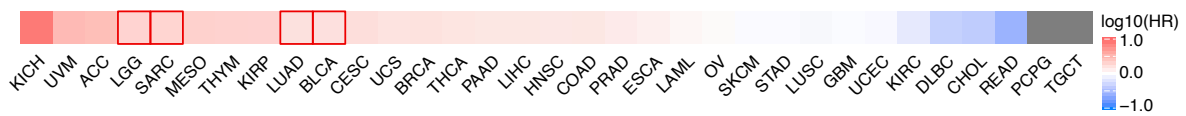

**F**

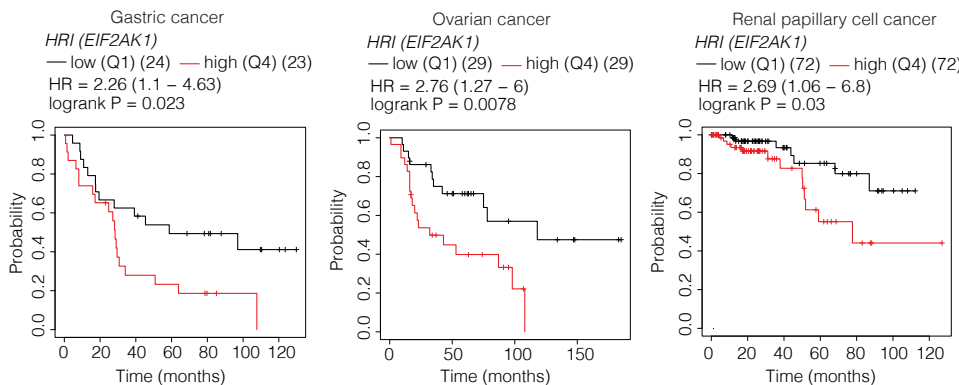

**G**

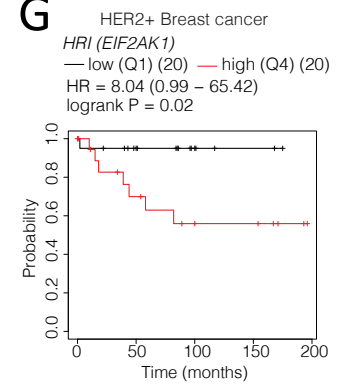

Supplement: NIHMS1828619-supplement-7.pdf [file NIHMS1828619-supplement-7.pdf]
