# Supplementary material
Source: PubMed Central journal article supplement (PMC9450215)
Supplement: NIHMS1828619-supplement-8.pdf [file NIHMS1828619-supplement-8.pdf]

**Supplementary Table 1. Selected\_pathways, related to Figures 2G and H**

| ID                                          | Database           | Category               |
|---------------------------------------------|--------------------|------------------------|
| GO:0000278                                  | GO BP              | Cell cycle             |
| HALLMARK_G2M_CHECKPOINT                     | MSigDB<br>hallmark | Cell cycle             |
| WHITFIELD_CELL_CYCLE_G2_M                   | MSigDB C2          | Cell cycle             |
| FISCHER_G2_M_CELL_CYCLE                     | MSigDB C2          | Cell cycle             |
| WHITFIELD_CELL_CYCLE_G2                     | MSigDB C2          | Cell cycle             |
| FISCHER_G1_S_CELL_CYCLE                     | MSigDB C2          | Cell cycle             |
| GO:0006929                                  | GO BP              | EMT                    |
| GO:0051894                                  | GO BP              | EMT                    |
| GO:0034114                                  | GO BP              | EMT                    |
| SARRIO_EPITHELIAL_MESENCHYMAL_TRANSITION_UP | MSigDB C2          | EMT                    |
| SARRIO_EPITHELIAL_MESENCHYMAL_TRANSITION_DN | MSigDB C2          | EMT                    |
| KEGG_GLUTATHIONE_METABOLISM                 | MSigDB C2          | Glutathione metabolism |
| REACTOME_SELENOAMINO_ACID_METABOLISM        | MSigDB C2          | Glutathione metabolism |
