# Supplementary material
Source: PubMed Central journal article supplement (PMC9450215)
Supplement: NIHMS1828619-supplement-9.pdf [file NIHMS1828619-supplement-9.pdf]

**Supplementary Table 2. scRNA-seq PC9 filter, related to Figures 3 and S2**

| Sample_name                   | Gene expressed at least in N cells (>0.15%) | Genes expressed at exceptional level           | nGene (aka nFeature) over all cells | Mito ratio | Ribo ratio | Original: nGene | Original: nCell | After filtering: nGene | After filtering: nCell | Retained Gene % | Retained Cell % |
|-------------------------------|---------------------------------------------|------------------------------------------------|-------------------------------------|------------|------------|-----------------|-----------------|------------------------|------------------------|-----------------|-----------------|
| 2214004_JCC287_PC9 MOCK2_GEX  | >0.15%                                      | Mito genes, ribosomal genes, FTH1, FTL, MALAT1 | >3500 & < 10000                     | <25        | >10        | 36601           | 8997            | 18632                  | 3753                   | 50.91%          | 41.71%          |
| 2214005_JCC287_PC9_1d_rel_GEX | >0.15%                                      | Mito genes, ribosomal genes, FTH1, FTL, MALAT1 | >1000 & < 10000                     | <10        | >0         | 36601           | 15898           | 17618                  | 15339                  | 48.14%          | 96.48%          |
| 2214006_JCC287_PC9_3d_rel_GEX | >0.15%                                      | Mito genes, ribosomal genes, FTH1, FTL, MALAT1 | >1000 & < 10000                     | <20        | >0         | 36601           | 16743           | 17470                  | 16406                  | 47.73%          | 97.99%          |
| 2214007_JCC287_PC9_1w_rel_GEX | >0.15%                                      | Mito genes, ribosomal genes, FTH1, FTL, MALAT1 | >1500 & < 9500                      | <20        | >0         | 36601           | 13781           | 18080                  | 9558                   | 49.40%          | 69.36%          |
