# Supplementary material
Source: PubMed Central journal article supplement (PMC9450215)
Supplement: NIHMS1828619-supplement-10.pdf [file NIHMS1828619-supplement-10.pdf]

**Supplementary Table 3. List of sgRNAs, related to the STAR methods section**

| REAGENT or RESOURCE                  | SEQUENCE / cat. No        | SOURCE                            |
|--------------------------------------|---------------------------|-----------------------------------|
| sgBAX FW                             | CACCGAGTAGAAAAGGGCGACAACC | Lopez, Nat Comm, 2015             |
| sgBAX REV                            | AAACGGTTGTCGCCCTTTTCTACTC | Lopez, Nat Comm, 2015             |
| sgBAK FW                             | CACCGCCATGCTGGTAGACGTGTA  | Lopez, Nat Comm, 2015             |
| sgBAK REV                            | AAACTACACGTCTACCAGCATGGCC | Lopez, Nat Comm, 2015             |
| sgBOK-CRISPR-FW                      | CACCGGATCTCGGCGGCGAAGACCG | Sanjana et al., Nat Methods, 2014 |
| sgBOK-CRISPR-REV                     | AAACCGGTCTTCGCCGCCGAGATCC | Sanjana et al., Nat Methods, 2014 |
| CRISPR/Cas9 APAF1 sgRNA (all in one) | abm12126140595            | abm                               |
| CRISPR/Cas9 CAP9 sgRNA (all in one)  | abm150791110595           | abm                               |
| sgATF4 #1_FW                         | CACCGTCTCTTAGATGATTACCTGG | Sanjana et al., Nat Methods, 2014 |
| sgATF4 #1_REV                        | AAACCCAGGTAATCATCTAAGAGAC | Sanjana et al., Nat Methods, 2014 |
| sgHRI #1 FW                          | CACCGtagctgcatcggagtg     | Sanjana et al., Nat Methods, 2014 |
| sgHRI #1 REV                         | AAACcactccgatgcagctacC    | Sanjana et al., Nat Methods, 2014 |
| sgCYCS FW #3                         | CACCGTCTTGTTTAGGCATCATCTG | Sanjana et al., Nat Methods, 2014 |
| sgCYCS REV #3                        | AAACCAGATGATGCCTAAACAAGAC | Sanjana et al., Nat Methods, 2014 |
