# Supplementary material
Source: PubMed Central journal article supplement (PMC9450215)
Supplement: NIHMS1828619-supplement-11.pdf [file NIHMS1828619-supplement-11.pdf]

**Supplementary Table 4. List of siRNAs, related to the STAR methods section**

| REAGENT or RESOURCE                          | SOURCE    | IDENTIFIER                      |
|----------------------------------------------|-----------|---------------------------------|
| siHRI #1 FW                                  | IDT       | hs.Ri.EIF2AK1.13.1 FW 5' to 3'  |
| siHRI #1 REV                                 | IDT       | hs.Ri.EIF2AK1.13.1 REV 5' to 3' |
| siHCCS #1 FW                                 | IDT       | hs.Ri.HCCS.13.1 FW 5' to 3'     |
| siHCCS #1 REV                                | IDT       | hs.Ri.HCCS.13.1 REV 5' to 3'    |
| siHCCS #2 FW                                 | IDT       | hs.Ri.HCCS.13.2 FW 5' to 3'     |
| siHCCS #2 REV                                | IDT       | hs.Ri.HCCS.13.2 REV 5' to 3'    |
| siCYCS #1 FW                                 | IDT       | hs.Ri.CYCS.13.1 FW 5' to 3'     |
| siCYCS #1 REV                                | IDT       | hs.Ri.CYCS.13.1 REV 5' to 3'    |
| siCYCS #2 FW                                 | IDT       | hs.Ri.CYCS.13.2 FW 5' to 3'     |
| siCYCS #2 REV                                | IDT       | hs.Ri.CYCS.13.2 REV 5' to 3'    |
| siPKR #1 FW                                  | IDT       | hs.Ri.EIF2AK2.13.1 FW 5' to 3'  |
| siPKR #1 REV                                 | IDT       | hs.Ri.EIF2AK2.13.1 REV 5' to 3' |
| siPERK #1 FW                                 | IDT       | hs.Ri.EIF2AK3.13.1 FW 5' to 3'  |
| siPERK #1 REV                                | IDT       | hs.Ri.EIF2AK3.13.1 REV 5' to 3' |
| SMARTpool: ON-TARGETplus BAX siRNA           | Dharmacon | L-003308-01-0005                |
| SMARTpool: ON-TARGETplus BAK1 siRNA          | Dharmacon | L-003305-00-0005                |
| ON-TARGETplus Non-targeting Pool             | Dharmacon | D-001810-10-05                  |
| SMARTpool: ON-TARGETplus Human EIF2AK4 siRNA | Dharmacon | L-005314-00-0005                |
| SMARTpool: ON-TARGETplus Human NFE2L2 siRNA  | Dharmacon | L-003755-00-0005                |
| SMARTpool: ON-TARGETplus Human ATF4 siRNA    | Dharmacon | L-005125-00-0005                |
| SMARTpool: ON-TARGETplus Human HMOX1 siRNA   | Dharmacon | L-006372-00-0005                |
| SMARTpool: ON-TARGETplus BOK siRNA           | Dharmacon | L-004394-00-0005                |
