# Supplementary material
Source: PubMed Central journal article supplement (PMC9450215)
Supplement: NIHMS1828619-supplement-12.pdf [file NIHMS1828619-supplement-12.pdf]

**Supplementary Table 5. List of human qPCR Primer, related to the STAR methods section**

| REAGENT or RESOURCE | SEQUENCE                 | Sequence SOURCE            |
|---------------------|--------------------------|----------------------------|
| ACTIN FW            | GCGAGAAGATGACCCAGATC     | origene                    |
| ACTIN REV           | CCAGTGGTACGGCCAGAGG      | origene                    |
| PDL1 FW             | TTGCTGAACGCCCCATACAA     | origene                    |
| PDL1 REV            | GGAATTGGTGGTGGTGGTCT     | origene                    |
| CREB5 FW            | GTCAGTGAACCCAGCATCATGG   | origene                    |
| CREB5 REV           | GTGGTGAGTCAATGCAGCCTTC   | origene                    |
| CXCL8 FW            | GAGAGTGATTGAGAGTGGACCAC  | origene                    |
| CXCL8 REV           | CACAACCTCTGCACCCAGTTT    | origene                    |
| ATF3 FW             | ATGATGCTTCAACACCCAGG     | Kim et al., NucAcRes, 2010 |
| ATF3 REV            | TTTCGGCACTTTGCAGCTG      | Kim et al., NucAcRes, 2010 |
| PTX3 FW             | CGAAATAGACAATGGACTCCATCC | origene                    |
| PTX3 REV            | CTCATCTGCGAGTTCTCCAGCA   | origene                    |
| VEGFa FW            | TTGCCTTGCTGCTCTACCTCCA   | origene                    |
| VEGFa REV           | GATGGCAGTAGCTGCGCTGATA   | origene                    |
| ASNS FW             | CTGTGAAGAACAACCTCAGGATC  | origene                    |
| ASNS REV            | AACAGAGTGGCAGCAACCAAGC   | origene                    |
| PTGS2 FW            | CGGTGAAACTCTGGCTAGACAG   | origene                    |
| PTGS2 REV           | GCAAACCGTAGATGCTCAGGGA   | origene                    |
| PTGS1 FW            | GATGAGCAGCTTTTCCAGACGAC  | origene                    |
| PTGS1 REV           | AACTGGACACCGAACAGCAGCT   | origene                    |
| GPX2 FW             | GCTCCCCTACCCTTATGATGA    | origene                    |
| GPX2 REV            | AAATGATGAGCTTGGGATCGG    | origene                    |
| IDH1 FW             | CTATGATGGTGACGTGCAGTCG   | origene                    |
| IDH1 REV            | CCTCTGCTTCTACTGTCTTGCC   | origene                    |
| CHAC1 FW            | GAACCTGGTTACCTGGGC       | primerbank (218563699c1)   |
| CHAC1 REV           | CGCAGCAAGTATTCAAGGTTGT   | primerbank (218563699c1)   |
| CHAC2 FW            | ACATCACCAACTACAGCAGGCG   | origene                    |
| CHAC2 rev           | CTGGCAATCTGTAAGCAACACCC  | Origene                    |
| GCLC FW             | GGAAGTGGATGTGGACACCAGA   | origene                    |
| GCLC REV            | GCTTGATGTCAGGATGGTTTGCG  | origene                    |
