# Supplementary material
Source: PubMed Central journal article supplement (PMC9450215)

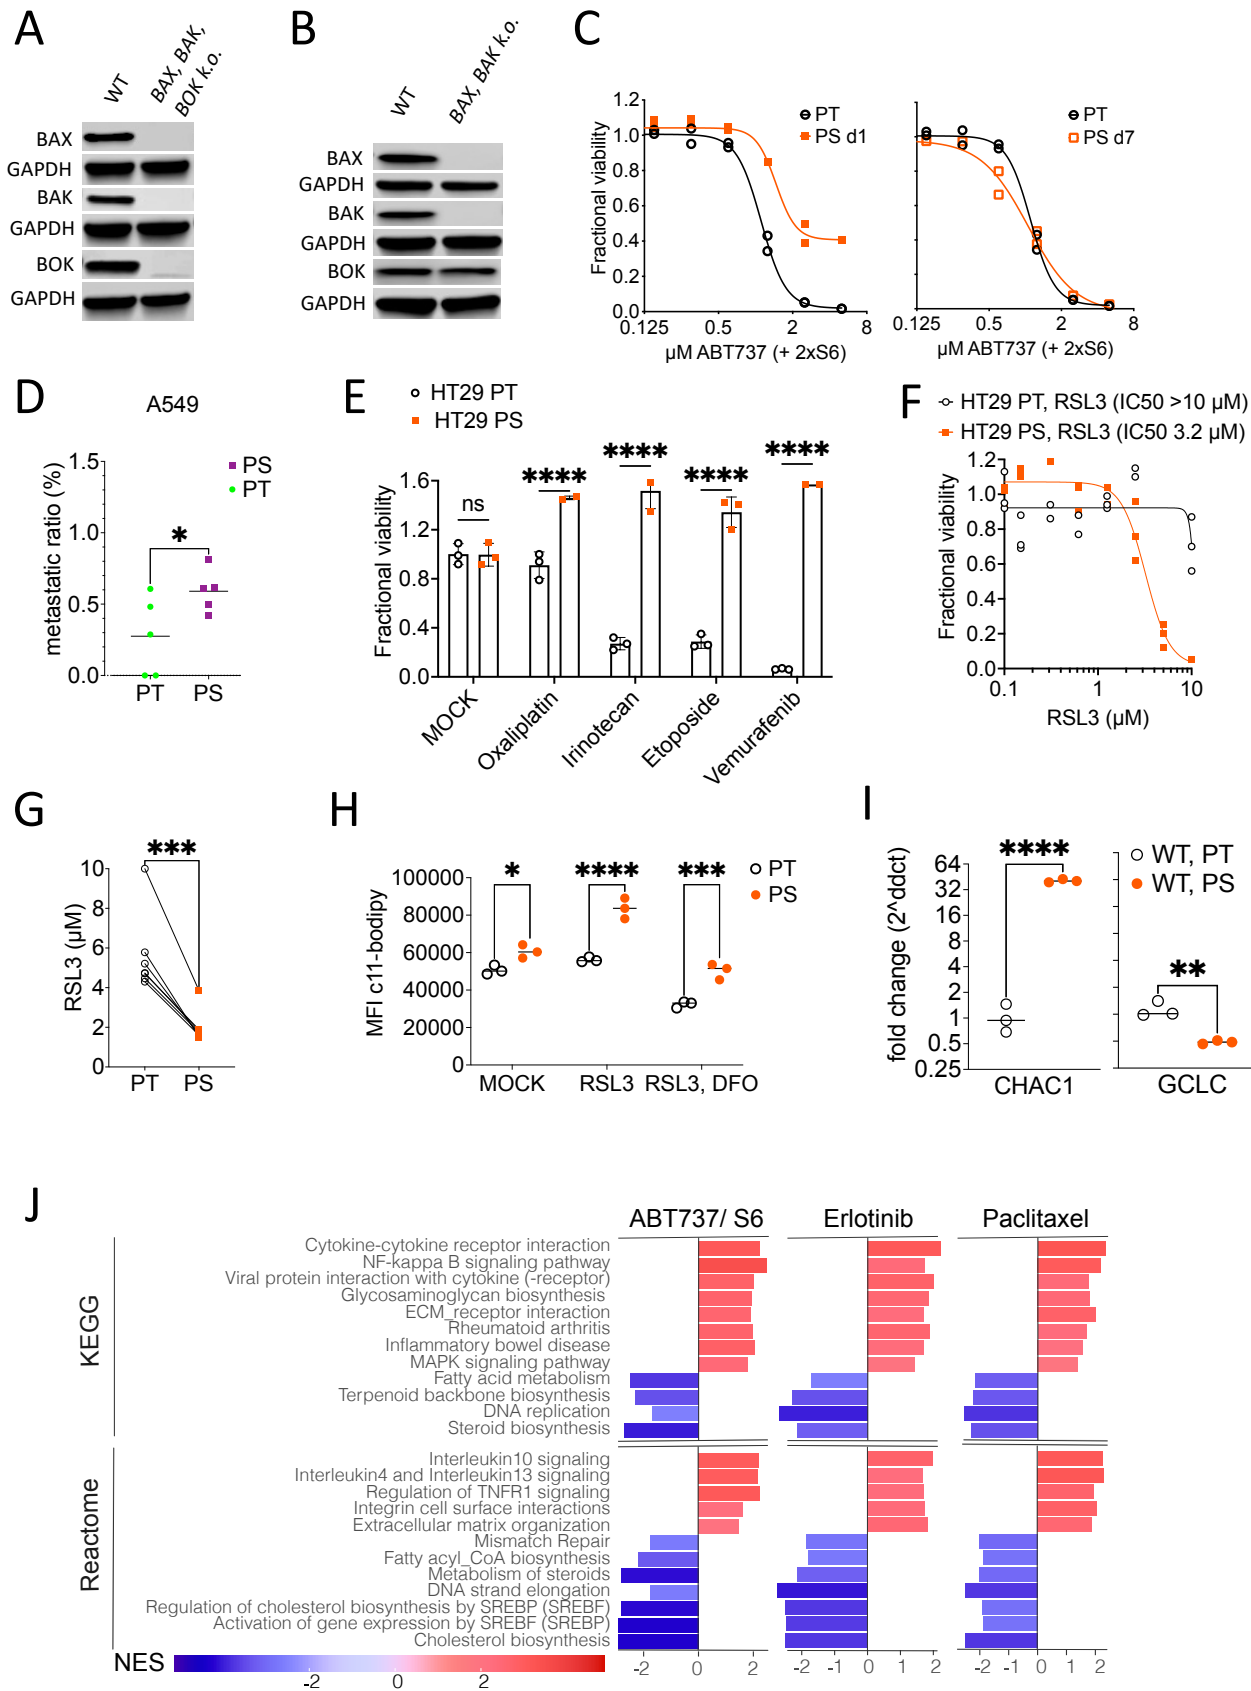

Supplement: NIHMS1828619-supplement-1.pdf [file NIHMS1828619-supplement-1.pdf]

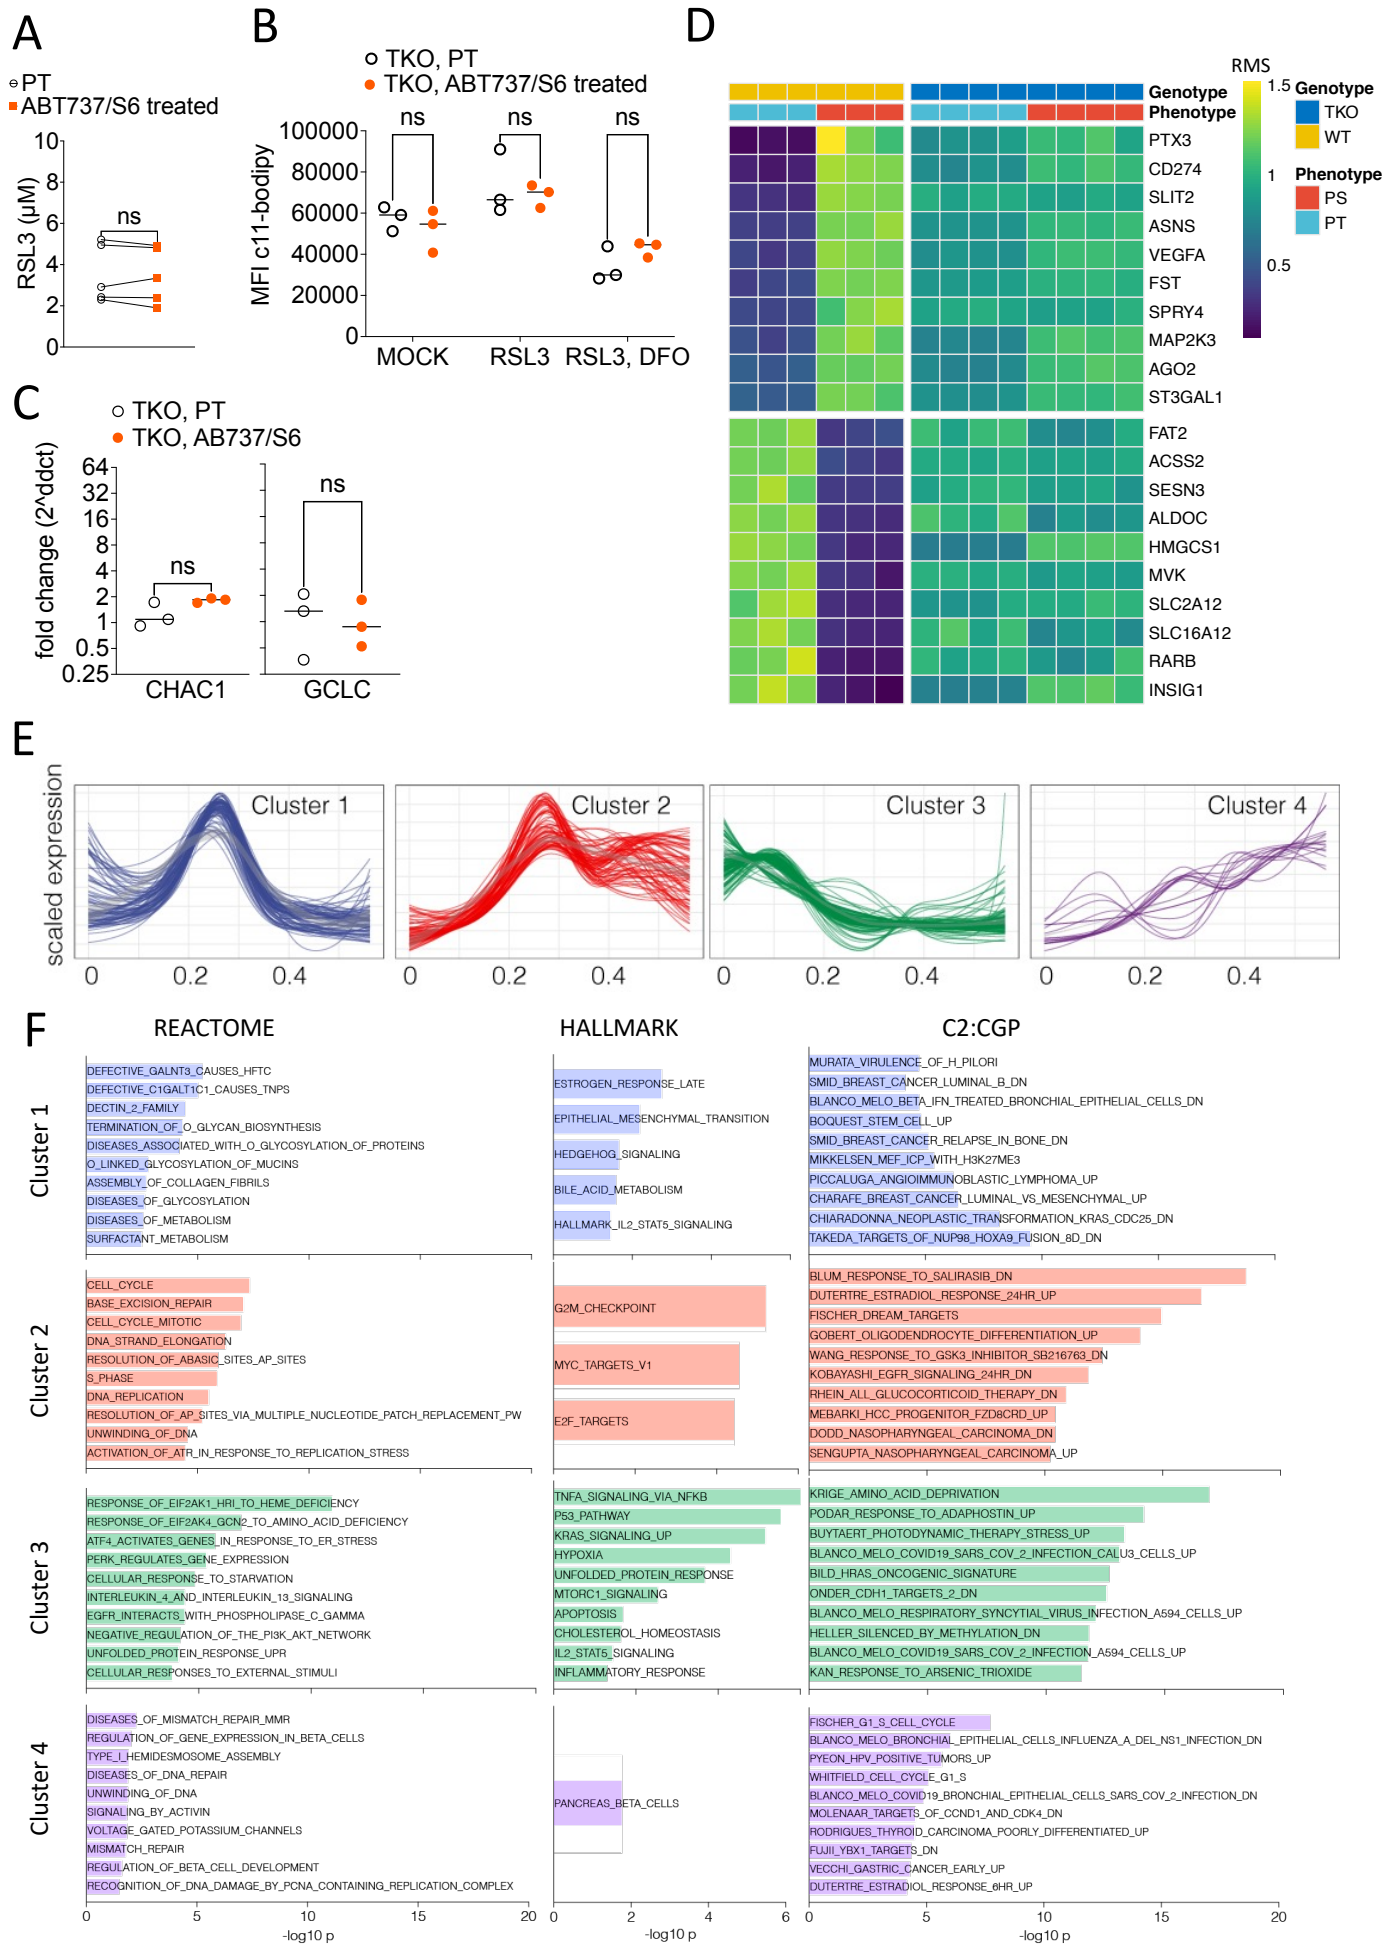

Supplement: NIHMS1828619-supplement-2.pdf [file NIHMS1828619-supplement-2.pdf]

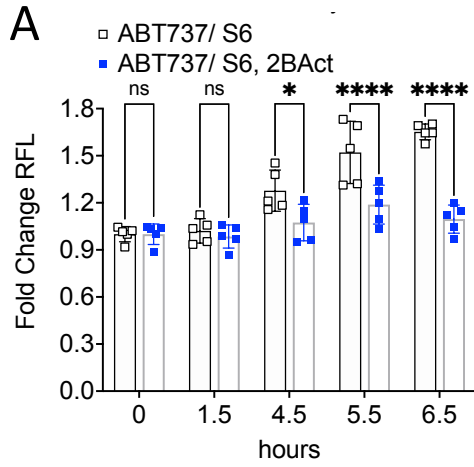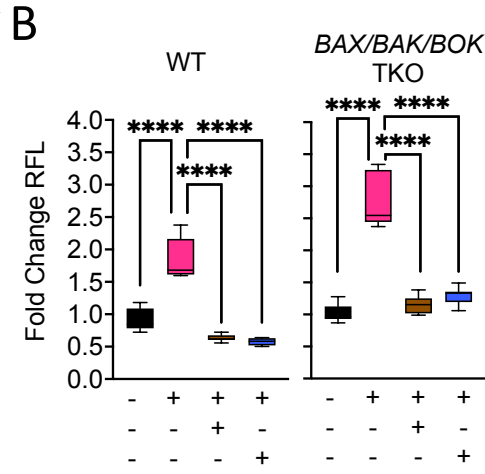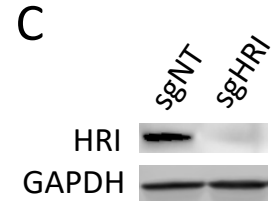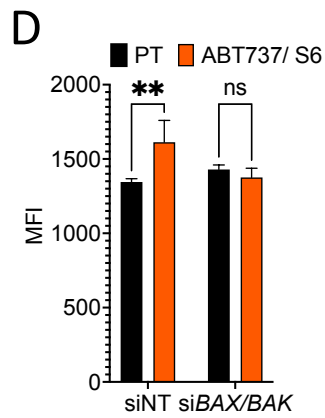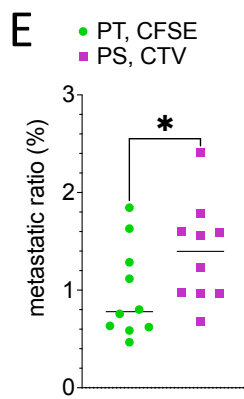

Supplement: NIHMS1828619-supplement-3.pdf [file NIHMS1828619-supplement-3.pdf]

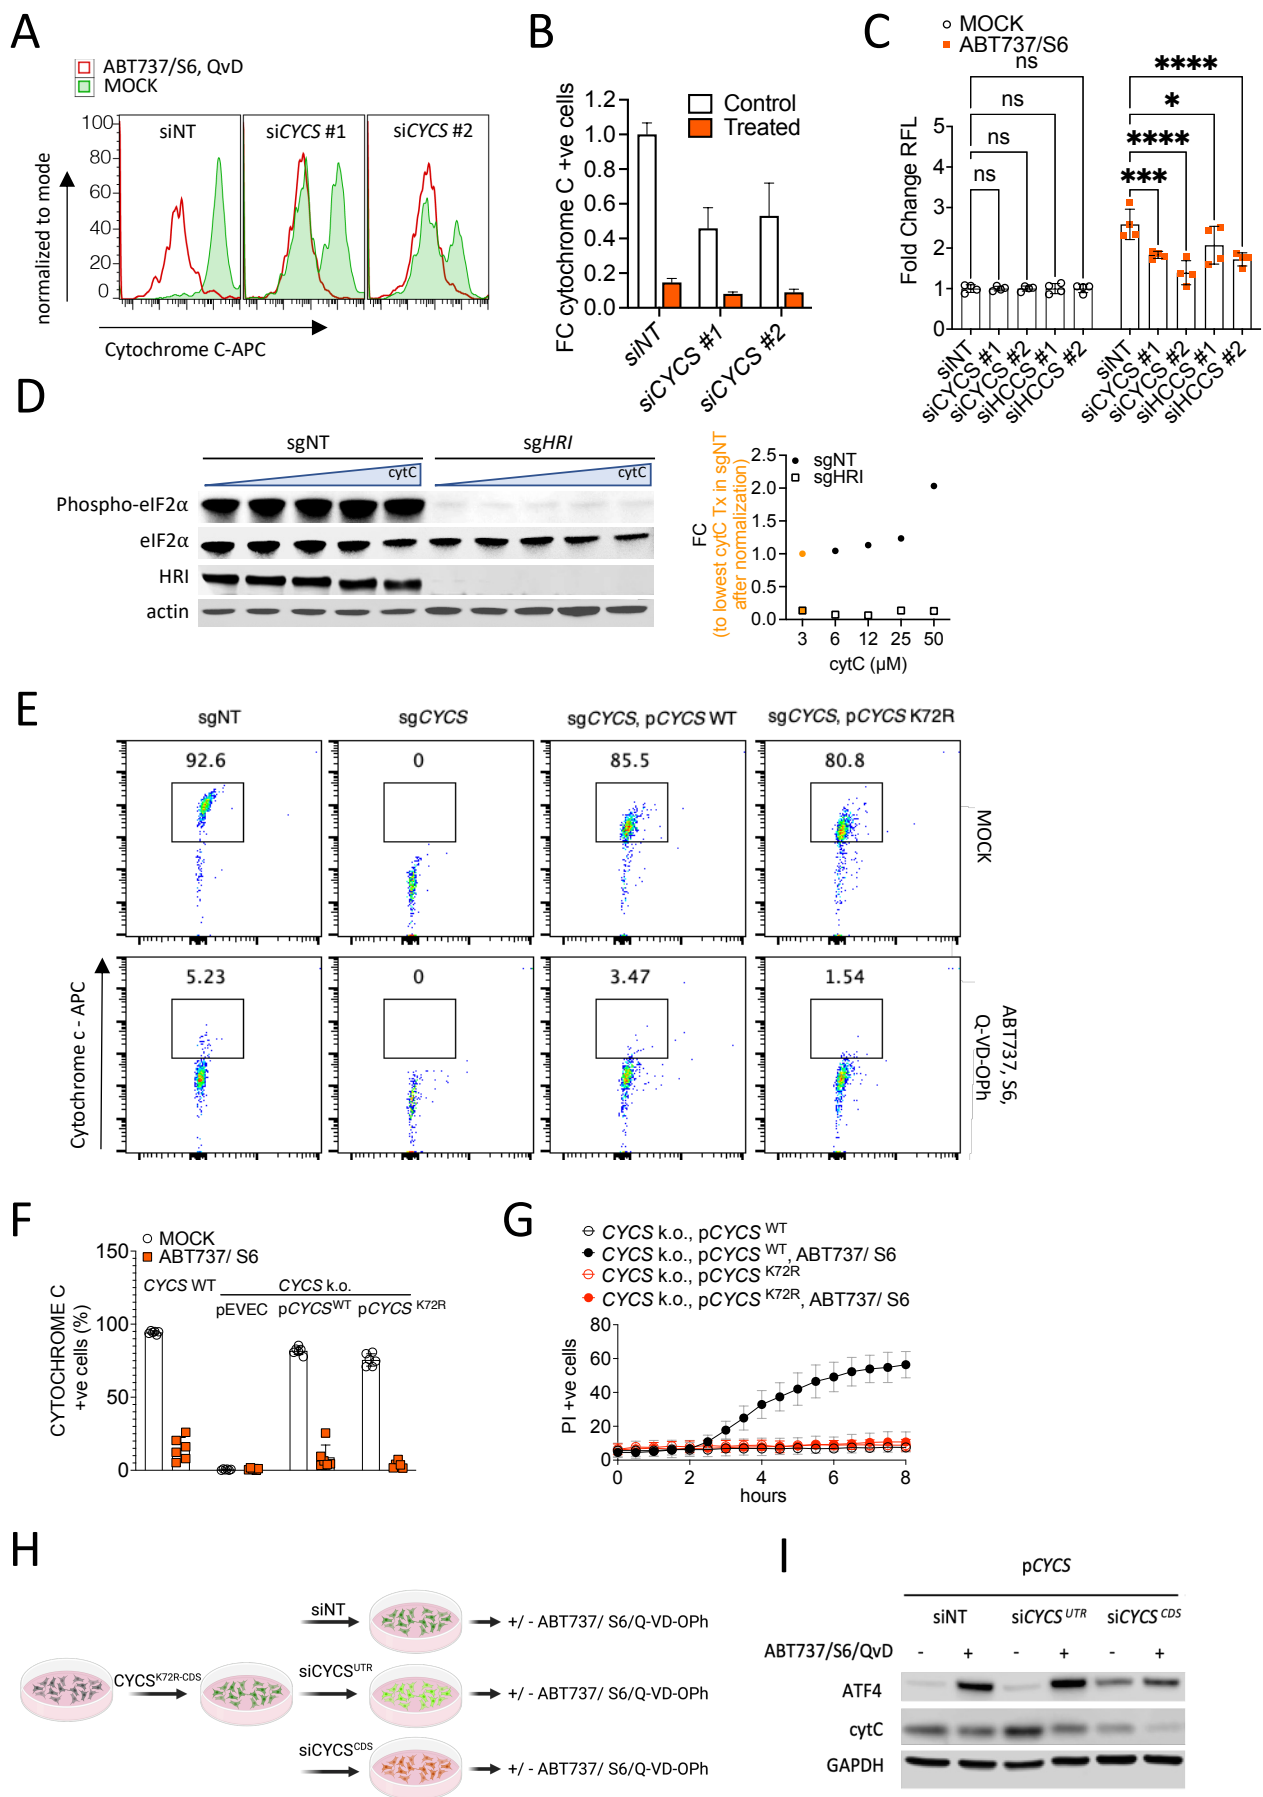

Supplement: NIHMS1828619-supplement-4.pdf [file NIHMS1828619-supplement-4.pdf]

**A**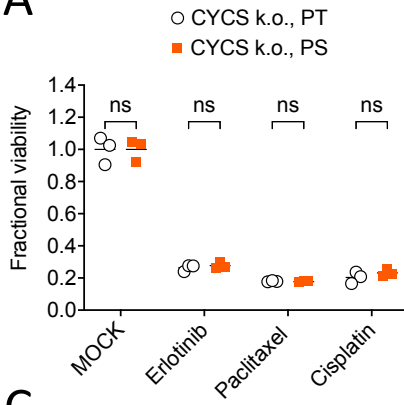**B**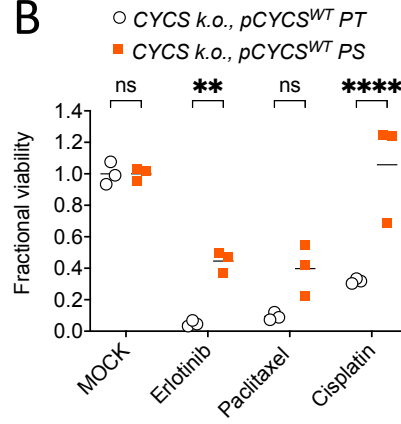**C**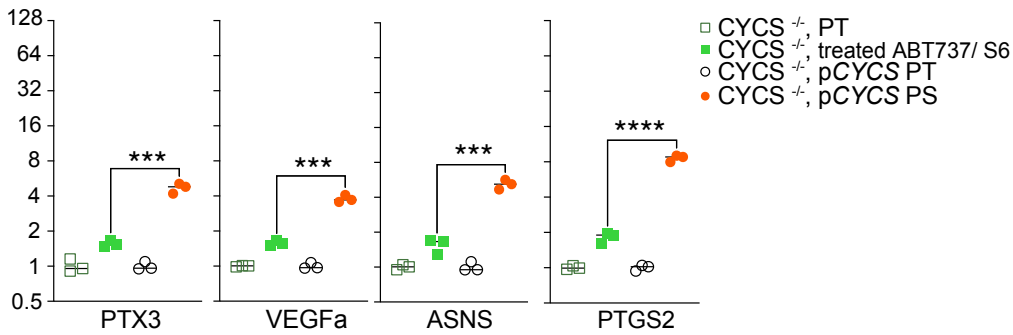**D**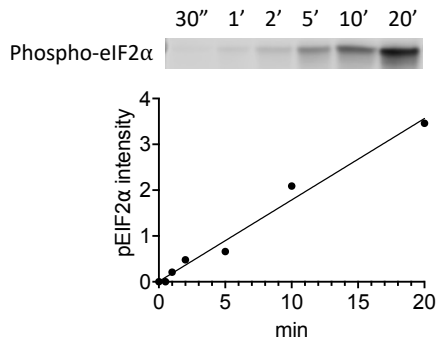**E**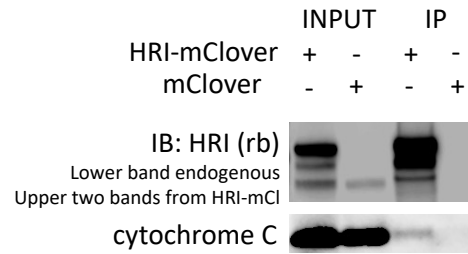**F**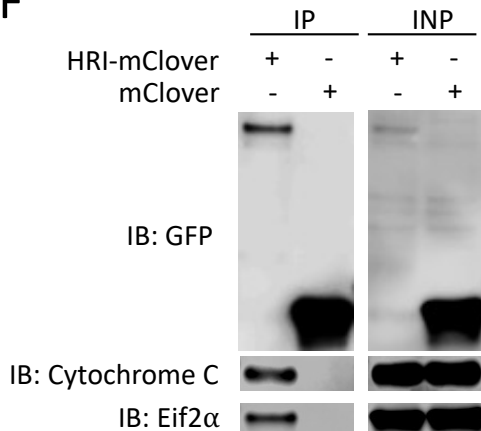

Supplement: NIHMS1828619-supplement-5.pdf [file NIHMS1828619-supplement-5.pdf]

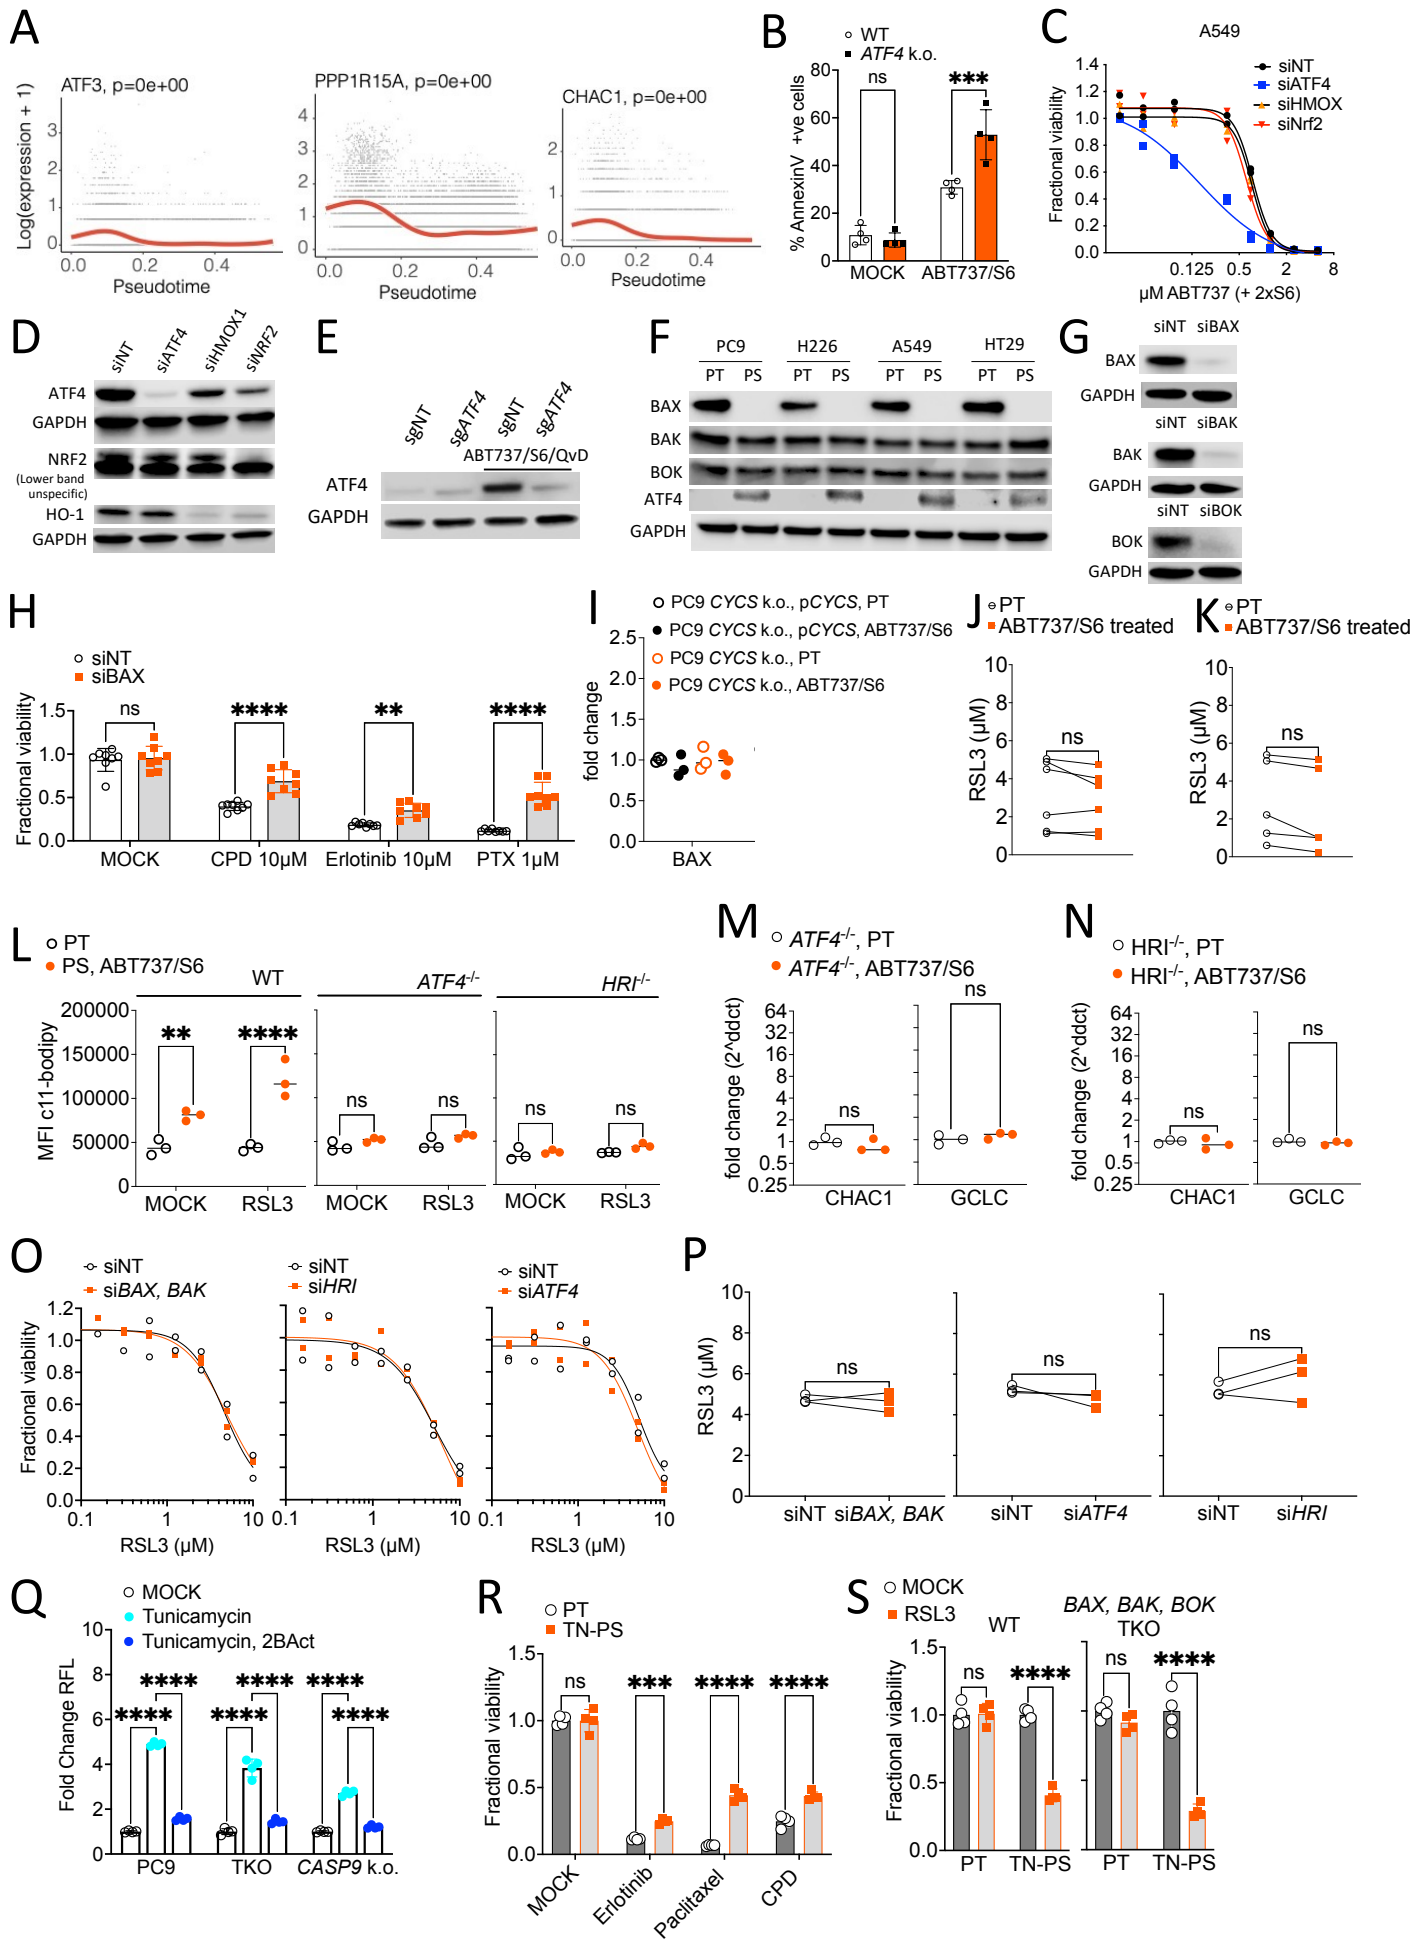

Supplement: NIHMS1828619-supplement-6.pdf [file NIHMS1828619-supplement-6.pdf]
